# Supplementary material for: An Internet- and Mobile-Based Tailored Intervention to Enhance Maintenance of Physical Activity After Cardiac Rehabilitation: Short-Term Results of a Randomized Controlled Trial
Source: PubMed Central journal article supplement (PMC3967125; doi:10.2196/jmir.3132), 2014-03-11
Supplement: jmir_v16i3e77_app4.pdf [file jmir_v16i3e77_app4.pdf]

|                                           | Study group |     |         |     | Comparison test                       |
|-------------------------------------------|-------------|-----|---------|-----|---------------------------------------|
|                                           | Tailored    |     | Control |     |                                       |
|                                           | Median      | IQR | Median  | IQR |                                       |
| Self-efficacy at discharge                | 5.0         | 2.0 | 5.0     | 2.0 | K-S<br>Z=0.505,<br>p=0.521,<br>r=0.09 |
| Self-efficacy at 1 month after discharge  | 5.0         | 2.0 | 5.0     | 1.0 | K-S<br>Z=0.709,<br>p=0.273,<br>r=0.16 |
| Self-efficacy at 3 months after discharge | 5.0         | 2.0 | 5.5     | 2.0 | K-S<br>Z=0.667,<br>p=0.365,<br>r=0.15 |
